# Supplementary material
Source: PubMed Central journal article supplement (PMC7368664)
Supplement: NIHMS1526375-supplement-1.pdf [file NIHMS1526375-supplement-1.pdf]

## The Selective RhoA Inhibitor Rhosin Promotes Stress Resiliency Through Enhancing D1-Medium Spiny Neuron Plasticity and Reducing Hyperexcitability

### Supplemental Information

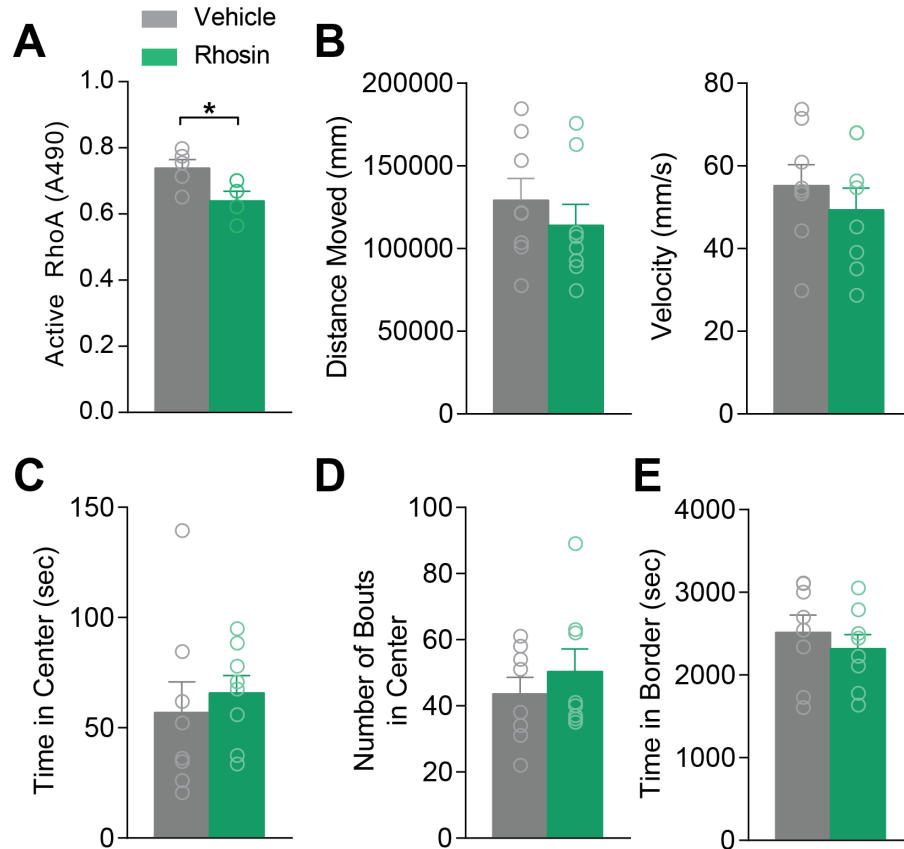

**Supplemental Figure S1. Rhosin inhibits RhoA *in vivo* and does not alter baseline behaviors.** (A) Rhosin decreases the amount of active RhoA following a single defeat session (two-tailed  $t_7=2.53$ ,  $p=0.04$ ,  $n=5,4$  mice per group). (B) Distance traveled (two-tailed  $t_{14}=0.83$ ,  $p=0.42$ ,  $n=8$  mice per group) and velocity (two-tailed  $t_{14}=0.81$ ,  $p=0.43$ ,  $n=8$  mice per group) in an open field was not affected by Rhosin administration. (C) Time in the center of an open field was not affected by Rhosin administration (two-tailed  $t_{14}=0.55$ ,  $p=0.59$ ,  $n=8$  mice per group). (D) The number of entries in to the center was not different among treatment groups (two-tailed  $t_{14}=0.80$ ,  $p=0.44$ ,  $n=8$  mice per group). (E) The time mice spent in the border did not vary across treatment (two-tailed  $t_{14}=0.74$ ,  $p=0.47$ ,  $n=8$  mice per group).

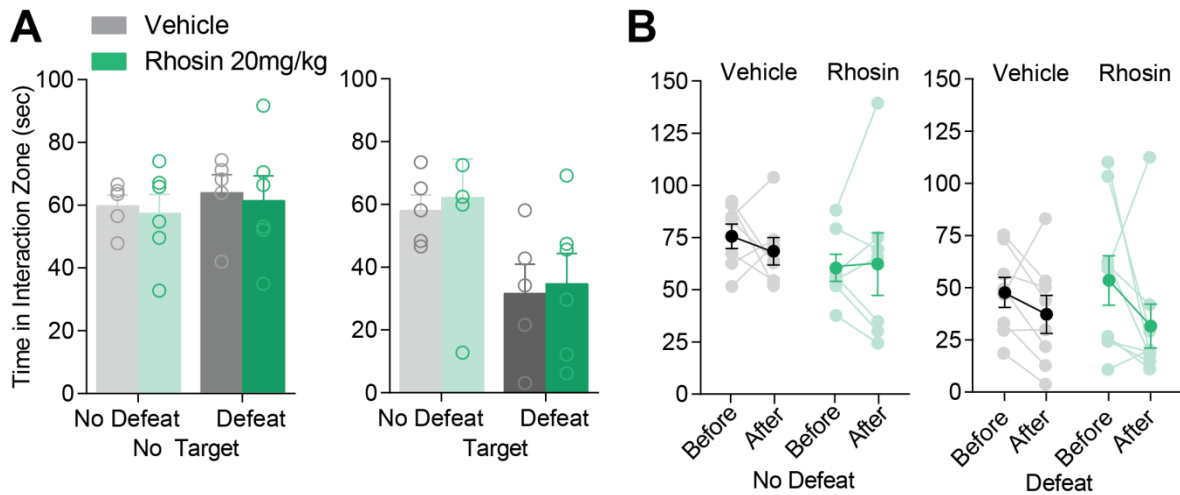

**Supplemental Figure S2. Low doses of Rhosin or Rhosin administration after defeat does not restore defeat-induced social aversion. (A)** Mice displayed no difference in interaction zone time in the no target condition (Two-way ANOVA no interaction  $F_{1,18}=0.51$ ,  $P=0.999$ ). Defeat mice displayed avoidance regardless of treatment (Two-way ANOVA no interaction  $F_{1,18}=0.002$ ,  $P=0.96$ ; main effect of defeat  $F_{1,18}=0.51$   $P=0.01$ ). For this experiment  $N=5-6$  mice per group. **(B)** 7 days of Rhosin (40mg/kg) administration after defeat does not alter stress-induced social aversion (Defeat: Two-way repeated measures ANOVA no interaction  $F_{1,15}=0.449$ ,  $P=0.51$ ; No defeat: Two-way repeated measures ANOVA no interaction  $F_{1,12}=0.449$ ,  $P=0.52$ ).

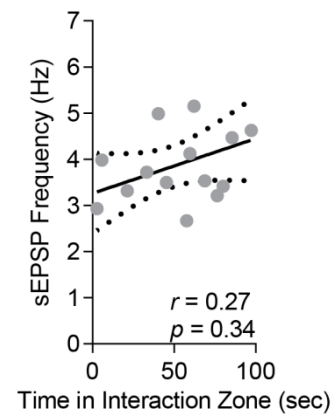

**Supplemental Figure S3. No correlation is observed between sEPSP frequency and behavior.**

Supplemental Table S1. Table of Statistics

| Figure | Panel               | Test                            | Subcategory                 | Test Statistic                                                                                                     | Exact P-value              |
|--------|---------------------|---------------------------------|-----------------------------|--------------------------------------------------------------------------------------------------------------------|----------------------------|
| 1      | B                   | Two-way ANOVA                   | No Target                   | No Interaction $F_{1,73}=0.66$                                                                                     | 0.4188                     |
|        |                     |                                 | Target                      | Interaction $F_{1,73}=4.50$<br>Main effect of defeat $F_{1,73}=28.05$                                              | 0.0373<br><0.0001          |
|        | C                   | Two-way ANOVA                   | Distance                    | No Interaction $F_{1,55}=0.79$                                                                                     | 0.3781                     |
|        |                     |                                 | Velocity                    | No Interaction $F_{1,55}=0.45$                                                                                     | 0.5037                     |
| D      | Two-way ANOVA       |                                 | Interaction $F_{1,33}=4.24$ | 0.0474                                                                                                             |                            |
| 2      | B                   | Two-way ANOVA                   |                             | No Interaction $F_{1,14}=0.51$                                                                                     | 0.4872                     |
|        | D                   | Two-way ANOVA                   |                             | Interaction $F_{1,14}=7.43$                                                                                        | 0.0184                     |
| 3      | A                   | Two-way ANOVA repeated measures |                             | Interaction $F_{18,254}=3.93$                                                                                      | <0.0001                    |
|        | B                   | Two-way ANOVA                   |                             | Interaction $F_{1,62}=7.59$                                                                                        | 0.0077                     |
|        | C                   | Pearson Correlation             |                             | $r=0.40$                                                                                                           | 0.0312                     |
|        | D                   | Two-way ANOVA                   |                             | Interaction $F_{1,62}=4.23$                                                                                        | 0.0438                     |
|        | E                   | Two-way ANOVA repeated measures |                             | No Interaction $F_{24,456}=3.388$<br>Main effect of defeat $F_{1,59}=3.311$<br>No defeat Rhosin vs. Defeat Vehicle | <0.0001<br>0.0263<br><0.05 |
|        | F                   | Two-way ANOVA                   |                             | No Interaction $F_{1,59}=0.03$<br>Main effect of defeat $F_{1,59}=15.87$                                           | 0.8574<br>0.0002           |
| 4      | B                   | Two-way ANOVA                   |                             | No Interaction $F_{1,28}=1.15$<br>Main effect of defeat $F_{1,28}=14.73$                                           | 0.2932<br>0.0006           |
|        | C                   | Two-way ANOVA                   |                             | No Interaction $F_{1,28}=2.31$<br>Main effect of defeat $F_{1,28}=14.20$                                           | 0.1395<br>0.0008           |
|        | D                   | Two-way ANOVA                   |                             | No Interaction $F_{1,28}=0.16$<br>Main effect of defeat $F_{1,28}=13.50$                                           | 0.6920<br>0.0010           |
|        | E                   | Two-way ANOVA                   |                             | No Interaction $F_{1,23}=0.23$                                                                                     | 0.6348                     |
| 5      | C                   | Kolmogorov–Smirnov test         |                             | Defeat Rhosin vs Defeat Vehicle<br>$D=0.19$                                                                        | <0.0001                    |
|        | D                   | Two-way ANOVA                   | Frequency                   | Interaction $F_{1,51}=4.85$                                                                                        | 0.0325                     |
|        |                     |                                 | Amplitude                   | Interaction $F_{1,51}=5.78$                                                                                        | 0.0200                     |
| 6      | B                   | Two-way ANOVA                   |                             | Interaction $F_{1,32}=5.31$                                                                                        | 0.0279                     |
|        | C                   | Two-way ANOVA                   | Thin                        | Interaction $F_{1,32}=7.03$                                                                                        | 0.0124                     |
|        |                     |                                 | Stubby                      | Interaction $F_{1,32}=0.18$                                                                                        | 0.6781                     |
|        |                     |                                 | Mushroom                    | Interaction $F_{1,32}=6.62$                                                                                        | 0.0151                     |
| D      | Pearson Correlation |                                 | $r=0.48$                    | 0.0122                                                                                                             |                            |
